# Supplementary material
Source: PubMed Central journal article supplement (PMC2799355)

Sup. figure 3

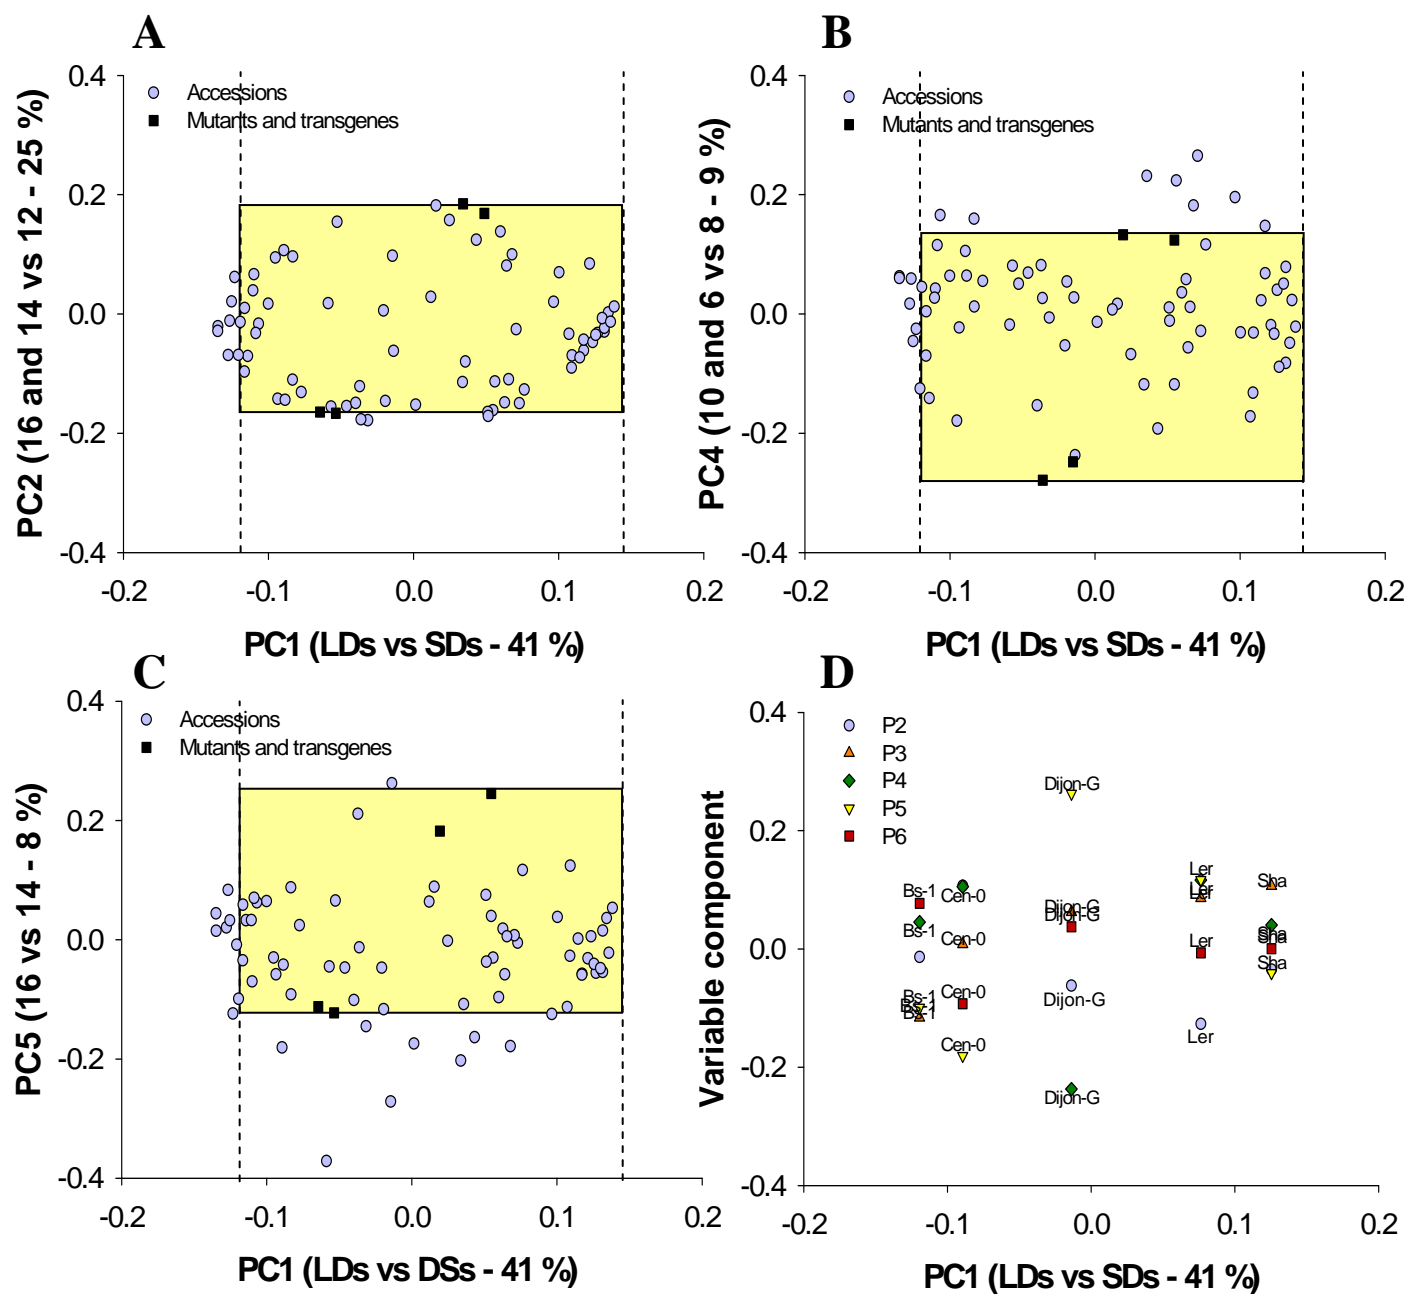

# Supp. figure 4

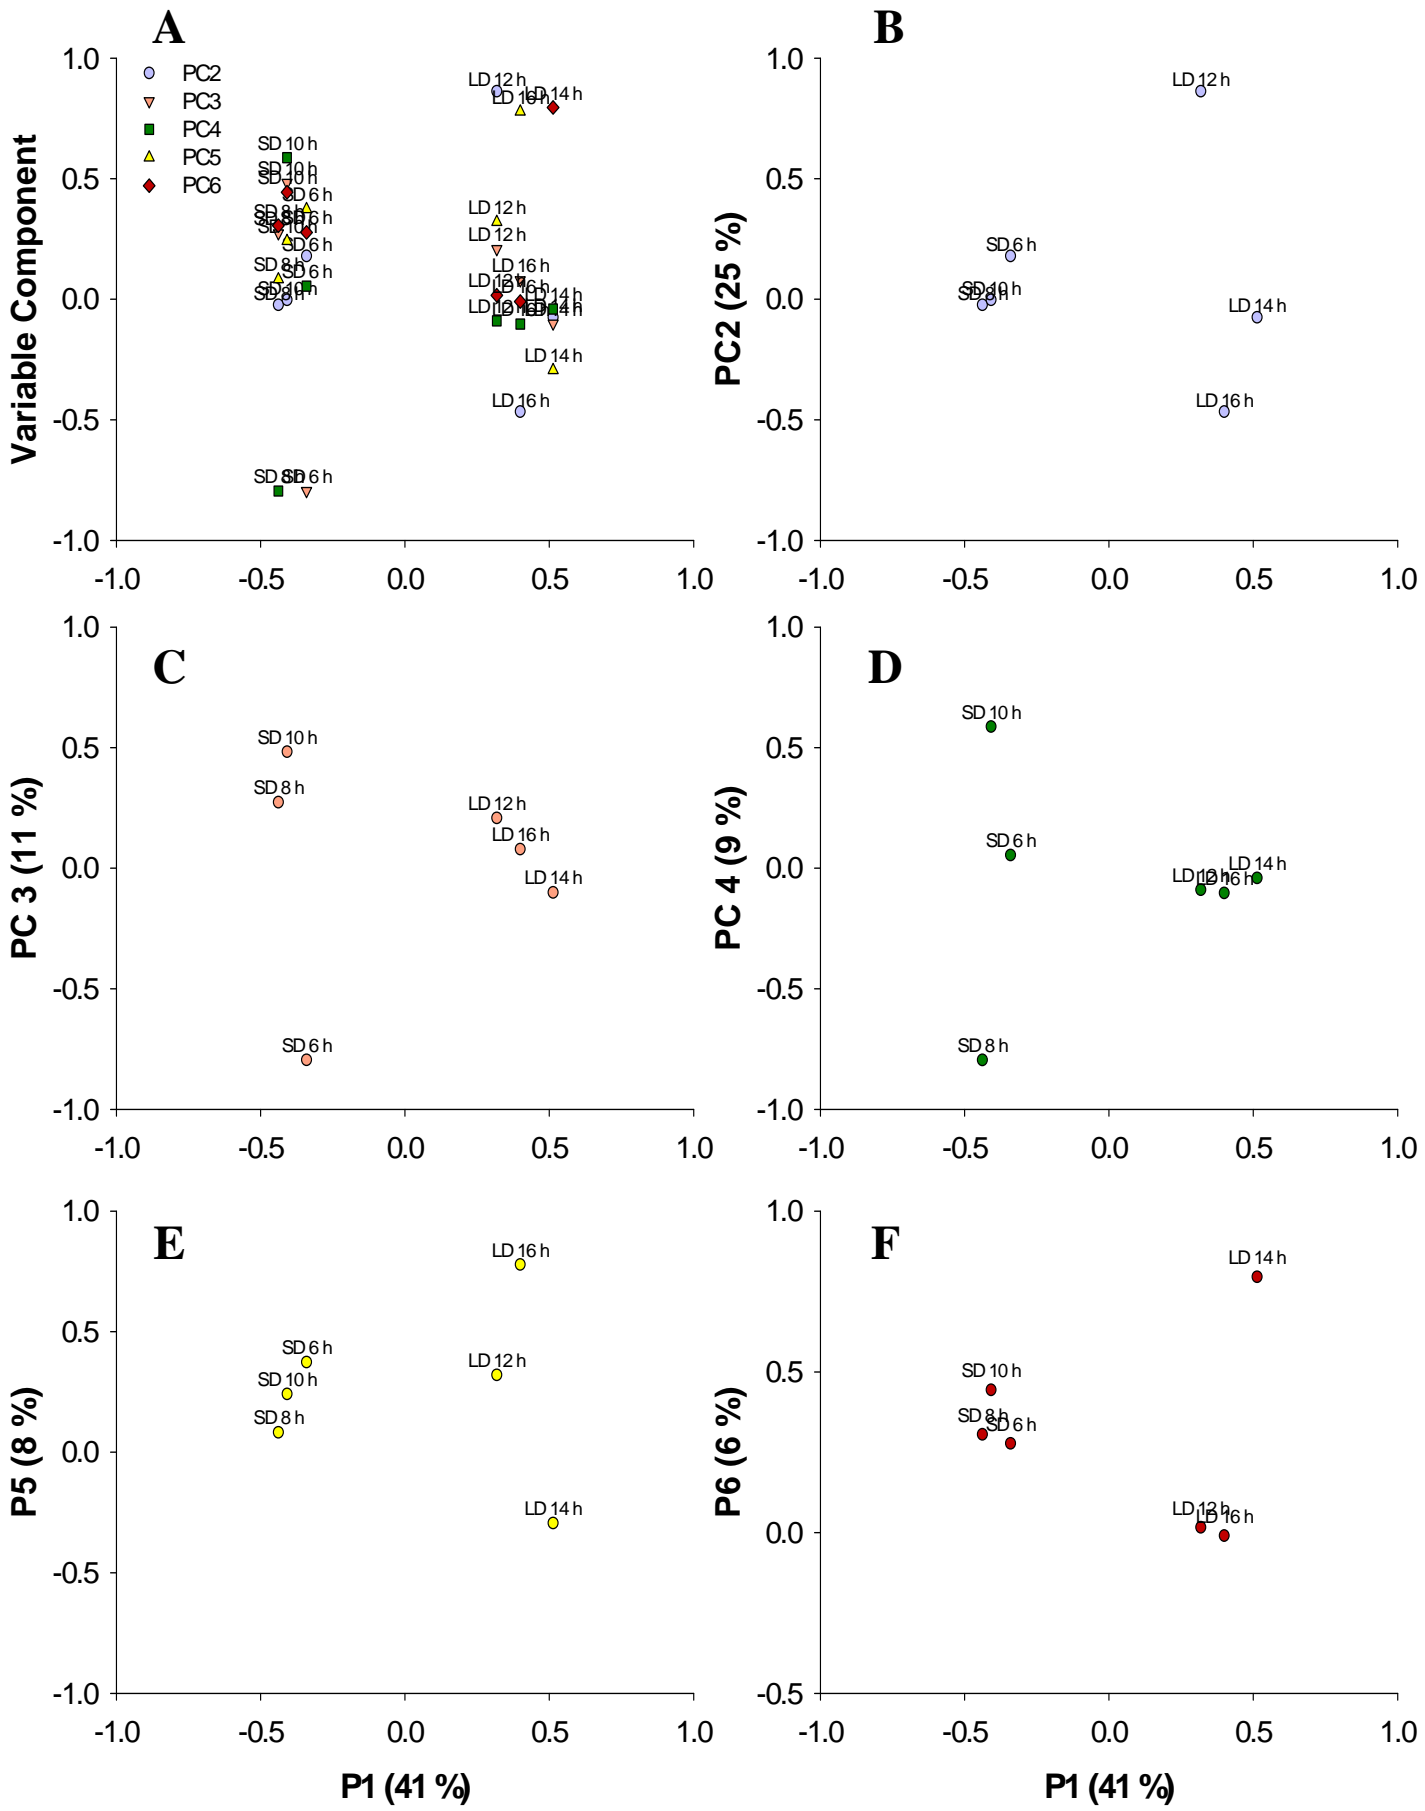

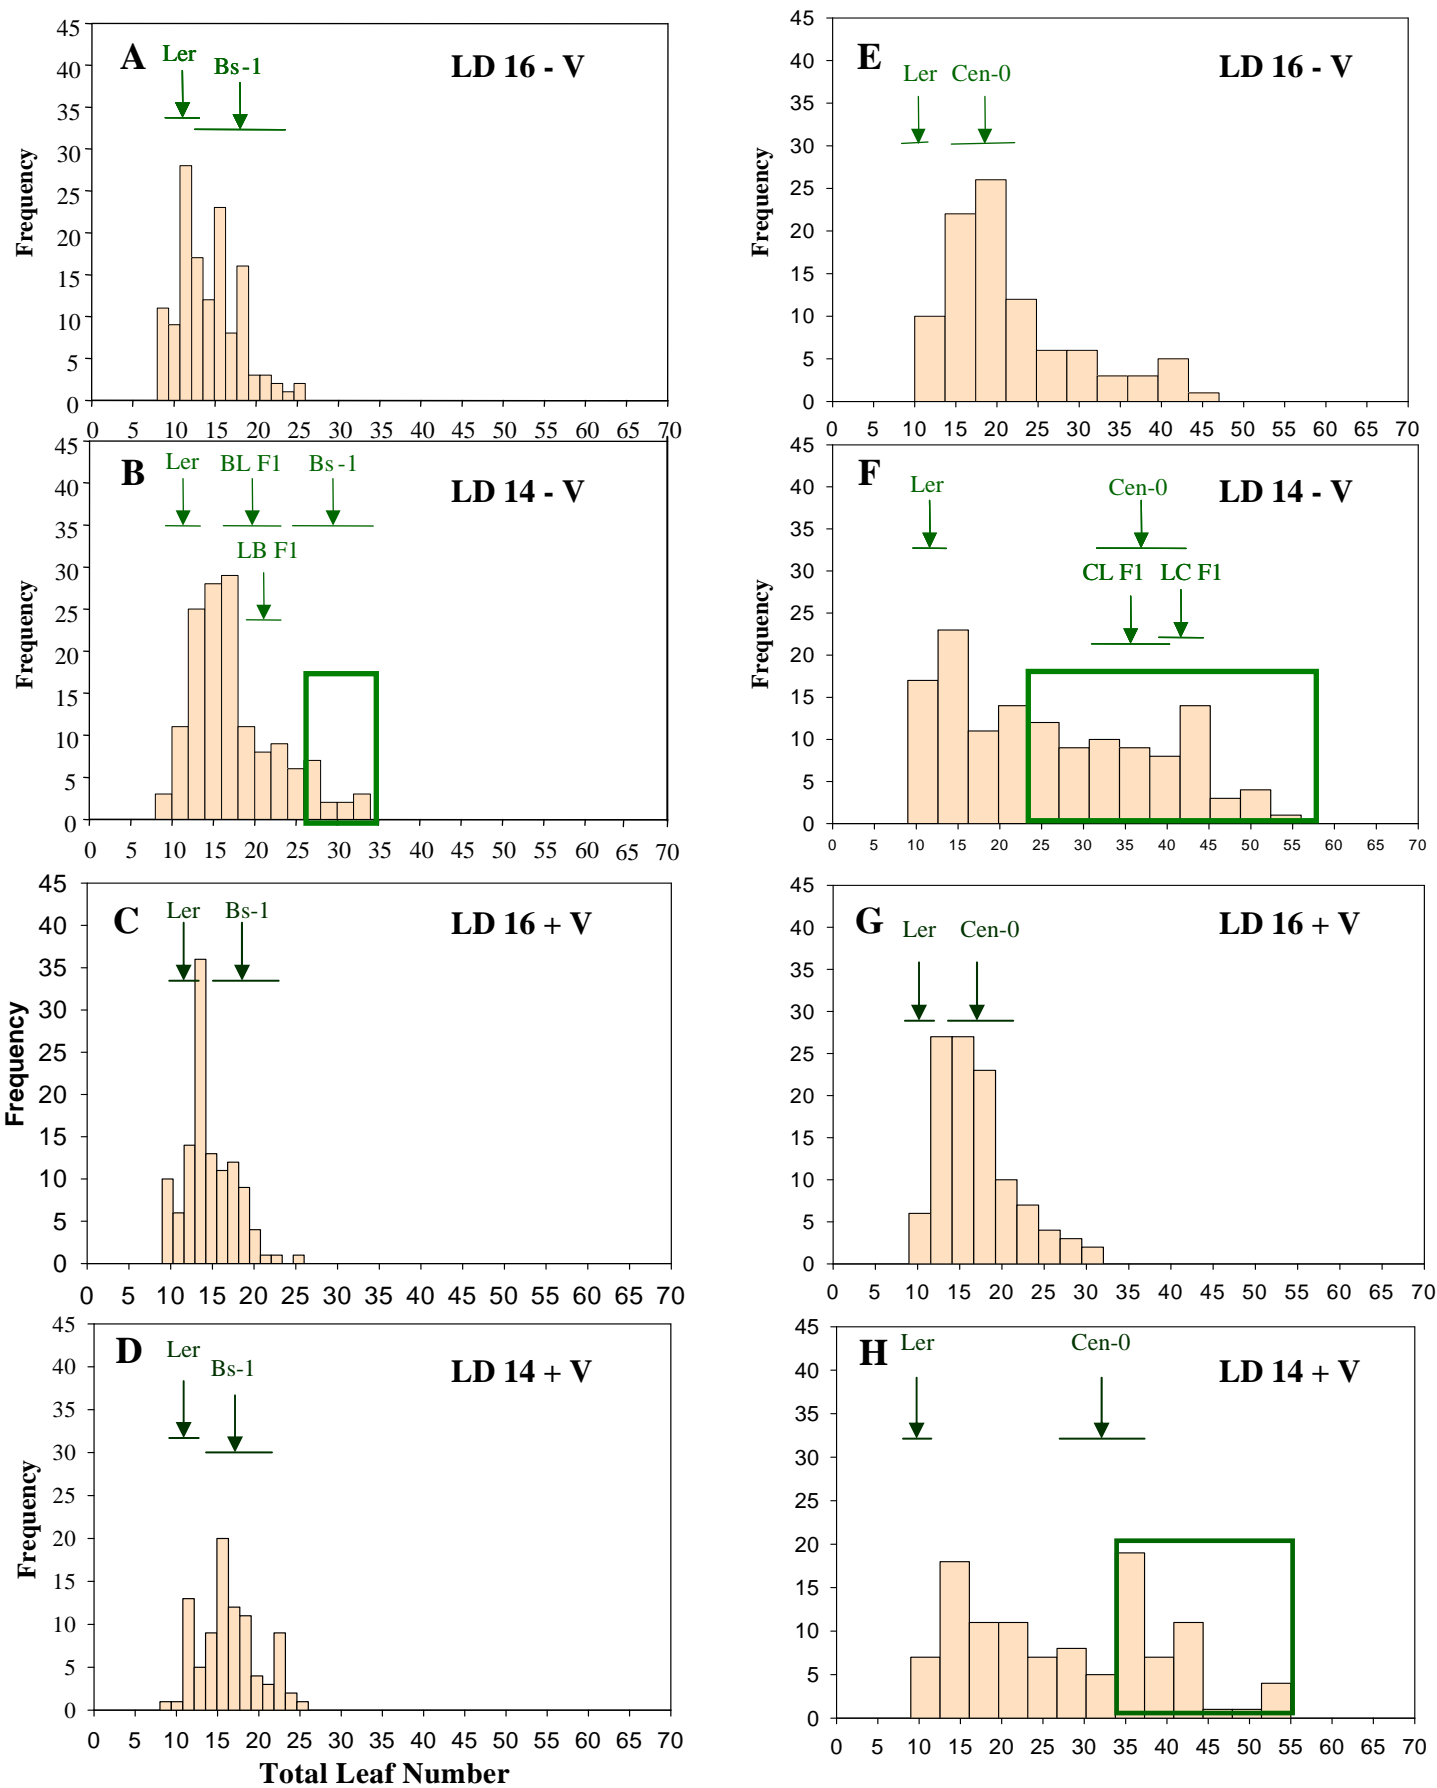

# Sup. figure 6

## A

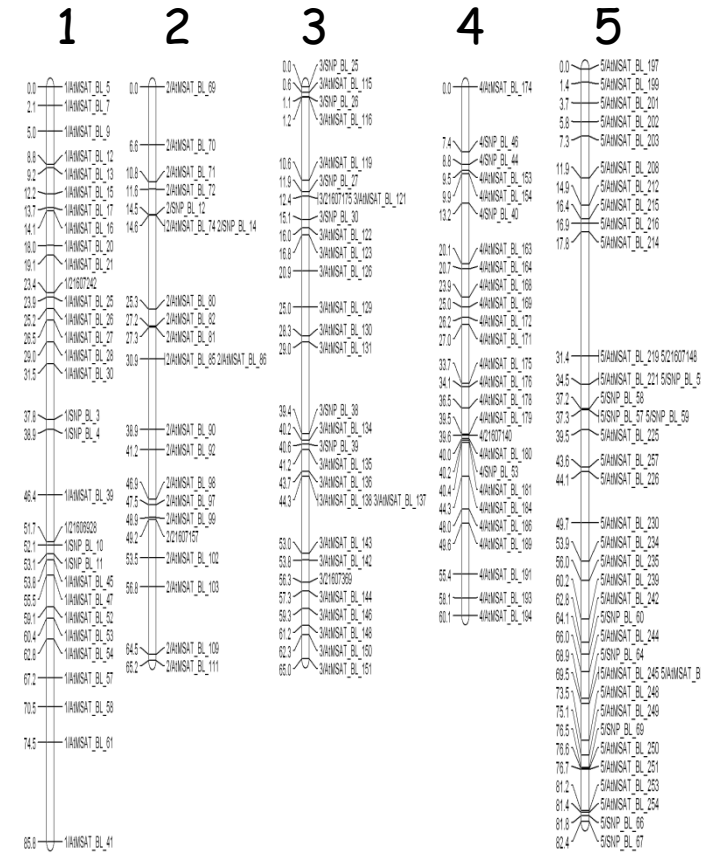

## B

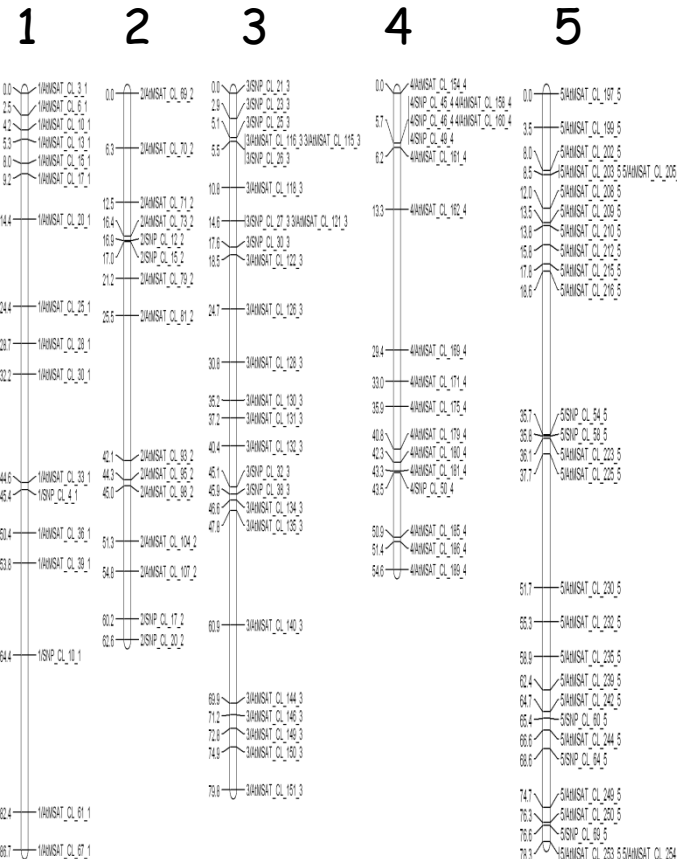

## C

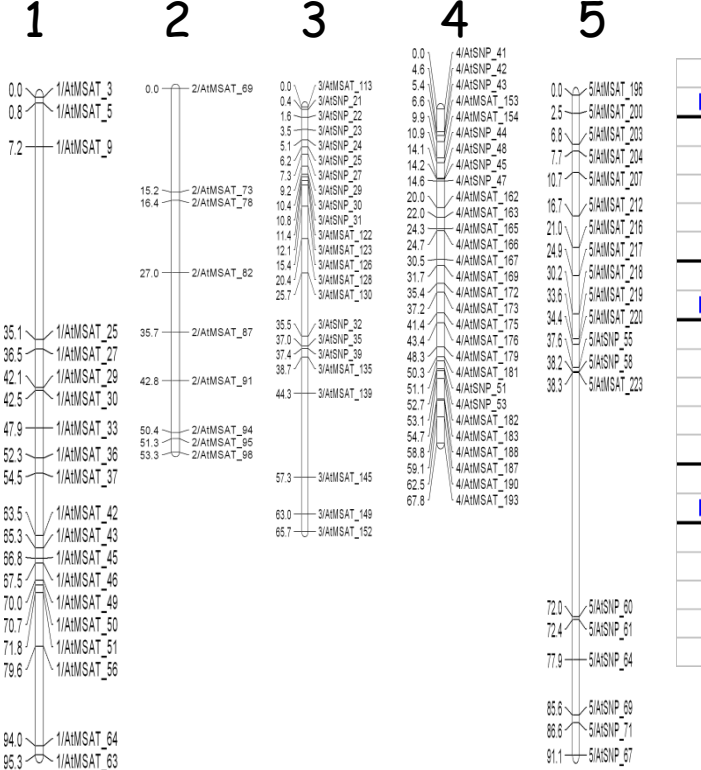

## D

| <i>Bc-1 x Ler</i>    |               |                   |                   |                       |                   |
|----------------------|---------------|-------------------|-------------------|-----------------------|-------------------|
| Linkage group        | Marker number | Max distance (cM) | Min Distance (cM) | Average Distance (cM) | Total Length (cM) |
| 1                    | 30            | 7.5               | 0.4               | 2.6                   | 340.7             |
| 2                    | 22            | 10.7              | 0.1               | 3.1                   |                   |
| 3                    | 28            | 10.3              | 0.0               | 2.4                   |                   |
| 4                    | 25            | 12.7              | 0.3               | 2.0                   |                   |
| 5                    | 36            | 11.6              | 0.5               | 2.2                   |                   |
| <i>Cen-0 x Ler</i>   |               |                   |                   |                       |                   |
| Linkage group        | Marker number | Max distance (cM) | Min Distance (cM) | Average Distance (cM) | Total Length (cM) |
| 1                    | 17            | 18.0              | 0.8               | 5.4                   | 362.1             |
| 2                    | 15            | 16.6              | 0.1               | 4.5                   |                   |
| 3                    | 26            | 13.2              | 0.4               | 3.2                   |                   |
| 4                    | 18            | 16.1              | 0.2               | 3.2                   |                   |
| 5                    | 28            | 17.1              | 0.3               | 2.9                   |                   |
| <i>Dijon-G x Sha</i> |               |                   |                   |                       |                   |
| Linkage group        | Marker number | Max distance (cM) | Min Distance (cM) | Average Distance (cM) | Total Length (cM) |
| 1                    | 21            | 27.8              | 0.4               | 5.3                   | 372.1             |
| 2                    | 9             | 15.2              | 0.8               | 6.7                   |                   |
| 3                    | 23            | 13.1              | 0.4               | 3.0                   |                   |
| 4                    | 28            | 5.7               | 0.4               | 2.5                   |                   |
| 5                    | 20            | 33.6              | 0.1               | 4.8                   |                   |

Sup. figure 7

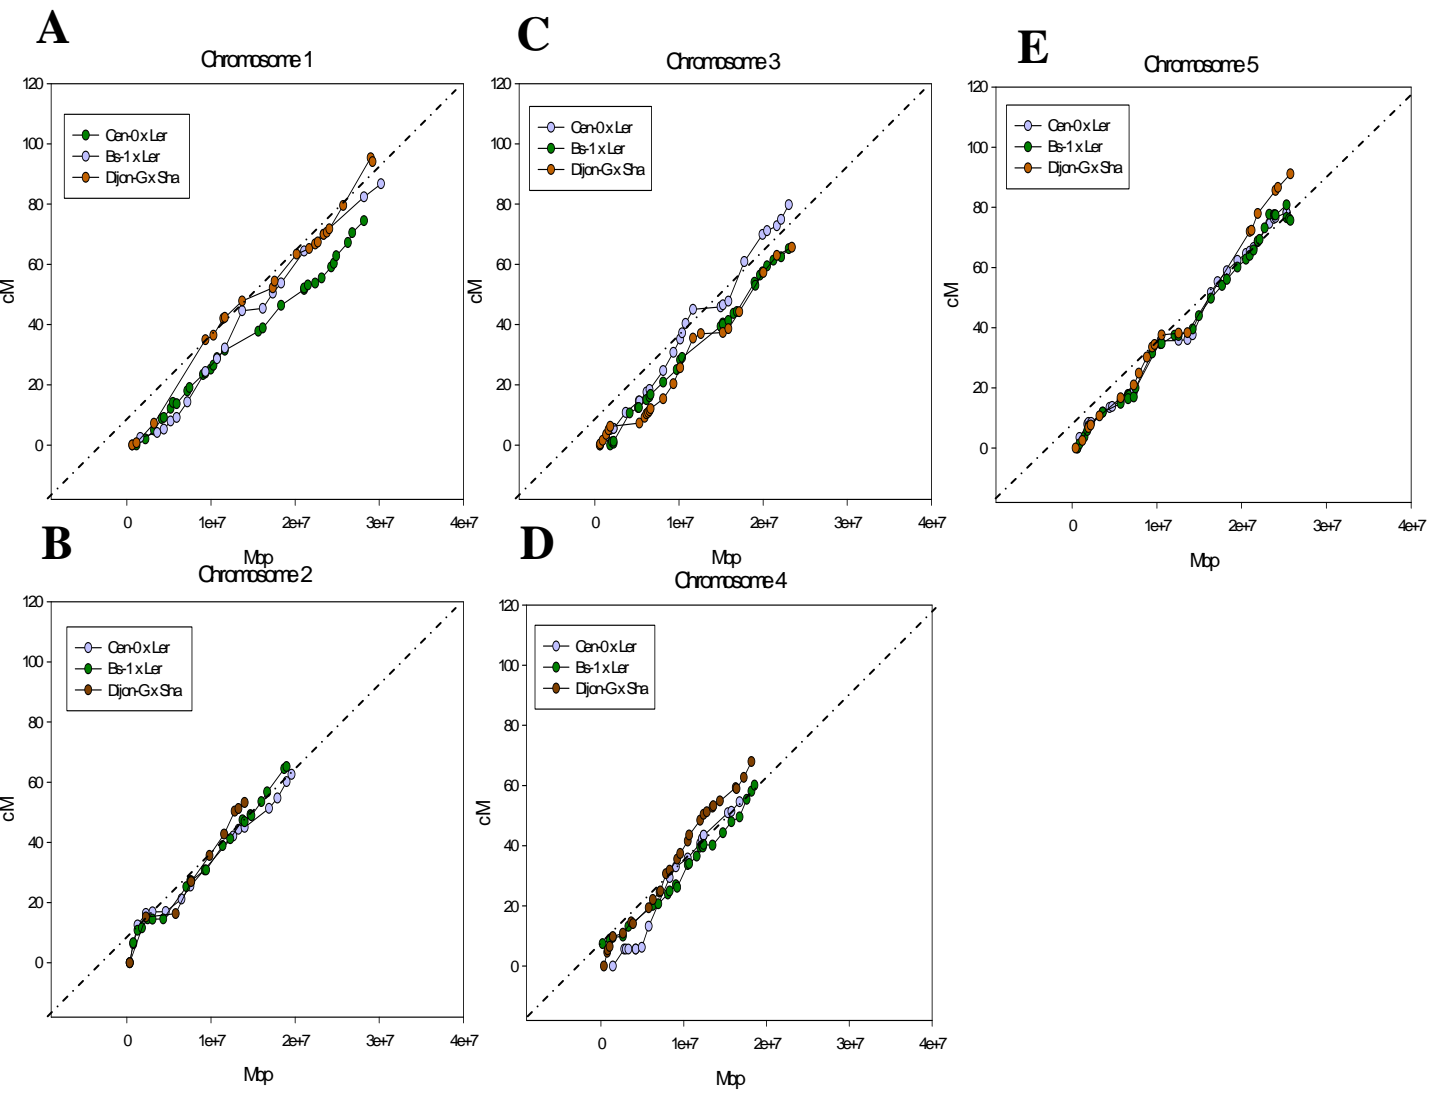

Supplement: pp.109.140772_2.pdf [file pp.109.140772_2.pdf]
