# Supplementary material
Source: PubMed Central journal article supplement (PMC2799355)
Supplement: pp.109.140772_1.pdf [file pp.109.140772_1.pdf]

## Supplementary Table 1

### Accessions

| Name    | SD 6 h | SD 8 h | SD 10 h | LD 12 h | LD 14 h | LD 16 h | Location      | Country     | Collection site       | Latitude |
|---------|--------|--------|---------|---------|---------|---------|---------------|-------------|-----------------------|----------|
| Aa-0    | 89.4   | 70.1   | 66.1    | 49.1    | 23.4    | 16.7    | Aua/Rhon      | Germany     | field border          | N51      |
| Ak-1    | 49.9   | 42.7   | 43.6    | 28.6    | 27.5    | 18.9    | Achkarren     | Germany     | vineyard              | N48      |
| An-2    | 52     | 50.3   | 46.6    | 38.4    | 24.6    | 21.2    | Antwerpen     | Belgium     | Botanic Garden        | N51      |
| Ang-0   | 98.7   | 65.1   | 64      | 54.6    | 32.7    | 19.4    | Angleur       | Belgium     | -                     | N50      |
| Ang-1   | -      | 62.8   | 62.5    | 58.4    | 32.1    | 21.4    | Angleur       | Belgium     | -                     | N50      |
| Ba-1    | 103    | 72.8   | 63.6    | 63.8    | 57.5    | 40.3    | Blackmount    | UK          | roadside 300m         | N52      |
| Bay-0   | 64.3   | 51.9   | 46.9    | 27.2    | 16.1    | 12.9    | Bayreuth      | Germany     | fallow land           | N49      |
| Bch-1   | 48.4   | 41.3   | 37.3    | 23.3    | 14.6    | 12.4    | Buchen        | Germany     | deposited sand        | N53      |
| Bd-0    | 55.2   | 48.2   | 45.2    | 25.9    | 17.7    | 13.8    | Berlin/Dahlem | Germany     | Botanic Garden        | N52      |
| Be-0    | 43     | 43.6   | 35.7    | 30.8    | 28.2    | 25.2    | Bensheim      | Germany     | -                     | N49      |
| Be-1    | 53     | 49.9   | 44.7    | 29.4    | 16.6    | 12.9    | Bensheim      | Germany     | -                     | N49      |
| Bl-1    | 72.8   | 70.6   | 62      | 55      | 57.1    | 46.2    | Bologna       | Italy       | Botanic Garden        | N44      |
| Bla-1   | 84.6   | 63.5   | 59.7    | 66      | 57.1    | 43.6    | Blanes        | Spain       | -                     | N41      |
| Bla-3   | 74.2   | 68.4   | 59.3    | 49.1    | 38.9    | 27.8    | Blanes        | Spain       | -                     | N41      |
| Br-0    | 141    | 99.8   | 94.8    | 86.8    | 81      | -       | Brunn         | Czech Rep.  | -                     | N49      |
| Bs-1    | 88.7   | 66.5   | 62.1    | 37.5    | 29.8    | 15.3    | Basel         | Switzerland | Botanic Garden        | N47      |
| Bs-2    | 70     | 63     | 51      | 34      | 29      | 25      | Basel         | Switzerland | Botanic Garden        | N47      |
| Bs-5    | 54     | 48     | 41      | 28      | 22      | 17      | Basel         | Switzerland | Botanic Garden        | N47      |
| Bsch-0  | 56     | 43     | -       | 29      | 24      | 16      | Buchschlag    | Germany     | horticultural nursery | N50      |
| Bsch-2  | 57.9   | 43.5   | 43.1    | 26.7    | 19.1    | 14      | Buchschlag    | Germany     | near a rail line      | N50      |
| Bu-0    | 86.3   | 66.2   | 55.2    | 34.5    | 20.9    | 12.8    | Burghaun      | Germany     | -                     | N50      |
| Bu-2    | 66     | 58.5   | 53.4    | 40.8    | 28.2    | 21.3    | Burghaun      | Germany     | -                     | N50      |
| Bur-0   | 81     | 64     | -       | 53      | 45      | 31      | Burren        | Ireland     | wall by roadside      | N52      |
| Cen-0   | 92     | 76.4   | 79.1    | 60.5    | 39.2    | 18.2    | Caen          | France      | Botanic Gardens       | N49      |
| Chi-0   | 91.2   | 79.7   | 66.4    | 54      | 56.5    | -       | Chisdra       | Russia      | river slope           | N54      |
| Cl-0    | 46.3   | 48.4   | 46.9    | 22.7    | 17.5    | 14.6    | Cl            | -           | -                     | -        |
| Co      | 54.4   | 51.8   | 47.1    | 41.9    | 35.4    | 32.4    | Coimbra       | Portugal    | Botanical Garden      | N40      |
| Co-2    | 88.1   | 77.8   | 75.6    | 63.6    | 54.9    | 40.4    | Coimbra       | Portugal    | Botanic Garden        | N40      |
| Col-0   | 71.2   | 63.1   | 61.2    | 33.7    | 18.7    | 15.4    | Columbia      | USA         | -                     | N38      |
| Col-2   | -      | 67     | 68.5    | 36.2    | 22.2    | 15.1    | Columbia      | USA         | -                     | -        |
| Col-3   | 84     | 64.4   | 62.4    | 32.1    | 17      | 15.3    | Columbia      | USA         | -                     | -        |
| Ct-1    | 44.2   | 48.6   | 43.2    | 21.8    | 18.1    | 14.3    | Catania       | Italy       | -                     | N37      |
| Cvi     | 31.2   | 24.7   | 22.9    | 24.1    | 20.8    | 17.7    | Cape Verdi    | Cape Verdi  | rocky wall with moss  | N15      |
| Da-0    | 61.4   | 44.9   | 42.3    | 24.4    | 15.9    | 14.7    | Darmstadt     | Germany     | -                     | N50      |
| Db-0    | 61     | 49     | 45.4    | 26.8    | 16.2    | 15.5    | Dombachtal    | Germany     | stony, sunny road     | N50      |
| Dijon-G | -      | 48.1   | 39.3    | 24.7    | 14.1    | 13.3    | Dijon         | France      | -                     | -        |
| Dijon-M | 49.6   | 43.4   | 35.1    | 19.1    | 16.2    | 14.1    | Dijon         | Russia      | -                     | -        |
| Dr-0    | 57     | 46.4   | 45.4    | 25.1    | 15.4    | 12.6    | Dresden       | Germany     | Botanic Garden        | N51      |
| Dra-0   | 43.9   | 38.8   | 34.3    | 17.1    | 14.2    | 10.3    | Drahonin      | Czech Rep.  | -                     | -        |
| Edi-0   | 83.7   | 75.2   | 57.6    | 46.4    | 29.7    | 18.9    | Edinburgh     | UK          | Botanic Garden        | N56      |
| Edi1-1  | -      | 9.4    | -       | 18.2    | 10.9    | 9.7     | Edinburgh     | UK          | Botanic Garden        | N56      |
| Ei      | 86.2   | 78.9   | 64.9    | -       | 58.9    | 48      | Eifel         | Germany     | -                     | N50      |
| Eil-0   | 55.4   | 39.2   | 37.4    | 20.3    | 18.7    | 14.7    | Eilenburg     | Germany     | -                     | N51      |
| El-0    | 71.8   | 66.6   | 47.5    | 23.7    | 15.3    | 13.4    | Ellershausen  | Germany     | limestone, south side | N51      |
| En-2    | 66.6   | 55.3   | 58.9    | 32.3    | 20.9    | 15.8    | Enkheim       | Germany     | field border          | N50      |

|           |       |      |      |      |      |      |                   |             |                      |     |
|-----------|-------|------|------|------|------|------|-------------------|-------------|----------------------|-----|
| Enkheim-D | 53    | 50   | 44   | 20   | 19   | 15   | Enkheim           | Ukraine     | -                    | -   |
| Enkheim-T | 83.9  | 57.6 | 60   | 30.9 | 23.8 | 16.4 | Enkheim           | Tadjikistan | -                    | -   |
| Ep-0      | 71.4  | 66.2 | 52.2 | 23   | 17.9 | 13.3 | Eppenheim         | Germany     | -                    | N50 |
| Er-0      | 135.7 | 94.5 | 86.6 | 73.6 | 58.1 | 28.5 | Erlangen          | Germany     | dry, sandy way       | N49 |
| Est       | 58    | 45   | -    | 21   | 16   | 13   | Estland           | Germany     | -                    | -   |
| Et-0      | 135.9 | 92   | 86   | 63.4 | 45.3 | 34.2 | -                 | -           | -                    | -   |
| Fi-0      | 80.2  | 78.6 | 75.3 | 60.9 | 48.4 | 33.8 | Frickhofen        | Germany     | -                    | N50 |
| Fr-4      | 106.6 | 72   | 71   | 37.4 | 20.4 | 19.8 | Frankfurt         | Germany     | Botanic Garden       | N50 |
| Gr        | 50.7  | 41.6 | 45.1 | 33.9 | 32.3 | 23.2 | Graz              | Austria     | -                    | N47 |
| Hi        | 64.7  | 64   | 48.9 | 25.1 | 15.4 | 12   | Hilversum         | Netherlands | -                    | N52 |
| H-O-G     | 73.2  | 64.3 | 58.4 | 41.9 | 35.4 | 20.1 | Hodja-Obi-Garm    | Tadjikistan | -                    | -   |
| Je54      | 101   | 86.7 | 75.7 | 56.8 | 37.8 | 21.5 | -                 | Czech Rep.  | -                    | -   |
| Ler       | 44.3  | 34.9 | 35.3 | 17.8 | 10.7 | 10.5 | Landsberg erecta  | Germany     | -                    | -   |
| Ler-1     | 49.9  | 45.4 | 44.2 | 19.3 | 13.4 | 11   | Landsberg erecta  | Germany     | -                    | -   |
| Lip-0     | 64.4  | 49.5 | 52.2 | 32.7 | 29.3 | 19.2 | Lipowiec          | Poland      | loamy soil/limestone | N50 |
| Lm        | 60.2  | 54.6 | 46.8 | 21.3 | 14.9 | 13.8 | Le Mans           | France      | wheat field          | N48 |
| Nd        | 45.6  | 42.9 | 39.9 | 23.4 | 15.2 | 13.6 | Niederzenz        | Germany     | -                    | -   |
| RLD1      | 47.1  | 33.1 | 29.6 | 11.7 | 10.4 | 9.1  | -                 | -           | -                    | -   |
| Rsch      | 68    | 64.9 | 60.3 | 36.9 | 23.7 | 18.5 | Rschew            | Russia      | -                    | N56 |
| Rubenz    | -     | 63.4 | 58.1 | 52.3 | 52.9 | 47   | Rubezhnoe         | Ukraine     | near lake            | -   |
| Sha       | 34.1  | 31.9 | 33   | 21.7 | 17.7 | 12.4 | Shakdara          | Tadjikistan | mountains            | -   |
| Sn(5)-1   | 50.1  | 44   | 41.7 | 27   | 21.3 | 16.5 | -                 | Czech Rep.  | -                    | -   |
| Ta        | 47.8  | 43.4 | 45.5 | 36.9 | 30.8 | 25.1 | Tabor             | Czech Rep.  | -                    | N49 |
| Wil       | 63.6  | 53.6 | 50.2 | 30.1 | 21.4 | 18.1 | -                 | -           | -                    | -   |
| Ws        | 43.1  | 38.9 | 34.7 | 16.1 | 13.3 | 10.3 | Wassilewskija     | Russia      | -                    | N52 |
| Yo        | 69.6  | 58.4 | 61.1 | 47   | 37.8 | 30   | Yosemite Nat.Park | USA         | granite sand valley  | -   |
| Ze-0      | 51.8  | 45.3 | 45.3 | 36.2 | 33.5 | 25.8 | -                 | -           | -                    | -   |

## Supplementary Table 2

### Mutants and transgenic lines

| Genotype                            | SD 6 h | SD 8 h | SD 10 h | LD 12 h | LD 14 h | LD 16 h | Background | Reference                                          |
|-------------------------------------|--------|--------|---------|---------|---------|---------|------------|----------------------------------------------------|
| <i>35S:CO cry1cry2</i>              | -      | 7.9    | 7.2     | 6.8     | 10      | 8.9     | Ler        | (Valverde et al., 2004)                            |
| <i>35S:GI</i>                       | -      | 20.3   | 14      | 11.9    | 10.1    | -       | Col-0      | (Mizoguchi et al., 2005)                           |
| <i>35S:GI</i>                       | -      | 14.7   | 11.9    | 10.2    | -       | -       | Ler        | (Mizoguchi et al., 2005)                           |
| <i>ado1-1</i>                       | -      | 53.6   | 31.1    | 16.5    | 15.6    | 14.2    | Col-0      | (Jarillo et al., 2001)                             |
| <i>ado3-1</i>                       | 88     | 66.9   | 63.6    | 61.1    | 44.1    | 26.9    | Col-0      | (Jarillo et al., 2001)                             |
| <i>CCA1-ox</i><br>( <i>35S:CO</i> ) | 72.4   | 67.3   | 66.9    | 42.4    | 12.1    | 13.4    | Col-0      | (Wang and Tobin, 1998)                             |
| <i>cca1-1</i>                       | -      | 57.8   | 59.7    | 39.8    | 48.1    | 46.2    | Ler        | (Green and Tobin, 1999;<br>Mizoguchi et al., 2002) |
| <i>co-2</i>                         | -      | 37.7   | 35.4    | 33.1    | 32.7    | 33.1    | Ler        | (Robson et al., 2001)                              |
| <i>co-3</i>                         | -      | 41.4   | 38.7    | 35.2    | 33.6    | 22.8    | Ler        | (Robson et al., 2001)                              |
| <i>co-7</i>                         | -      | 34.3   | 36.2    | 30.8    | 30.8    | 31      | Ler        | (Robson et al., 2001)                              |
| <i>cop1-4</i>                       | 10.2   | 10.3   | -       | 9.8     | 9.6     | 7.9     | Col-0      | (Mcnellis et al., 1994)                            |
| <i>cry1-1</i>                       | 56     | 44.6   | 40.7    | 22.1    | 13.6    | 10.7    | Ler        | (Ahmad and Cashmore, 1993)                         |
| <i>cry2-1</i>                       | -      | 44.6   | 37.7    | 23.2    | 16.4    | 11.4    | Ler        | (Koornneef et al., 1998; Lin et al., 1998)         |
| <i>edi1-1</i>                       | 10     | 9.3    | 9.8     | 9.2     | 9.4     | 8.5     | Ler        | (El-Assal et al., 2001)                            |
| <i>elf3-1</i>                       | -      | 9.9    | 8.2     | 8.2     | 8.6     | 10.1    | Ler        | (Hicks et al., 1996)                               |
| <i>fca-1</i>                        | 79.3   | 59.6   |         | 48.9    | 32.3    | 29.7    | Ler        | (Koornneef et al., 1998)                           |
| <i>fca-1 co-2</i>                   | 62.7   | 48.9   | 48.5    | 44.8    | 39.9    | 35.8    | Ler        | (Koornneef et al., 1998)                           |
| <i>fca-1 co-3</i>                   | 66.6   | 58.8   | 52.9    | 49.1    | 43.2    | 37.5    | Ler        | (Koornneef et al., 1998)                           |
| <i>fca-1 lhy-1</i>                  | 72.8   | 62.9   | 56.3    | 56.9    | 52      | 48.9    | Ler        | This study                                         |
| <i>ft-7</i>                         | -      | 43.3   | 42.9    | 40.1    | 32.6    | 27.6    | Ler        | (Onouchi et al., 2000)                             |
| <i>lhy-11</i>                       | 51.2   | 50.8   | 33.1    | 18.1    | 11.1    | 9.8     | Ler        | (Mizoguchi et al., 2002)                           |
| <i>lhy-1</i>                        | -      | 79.9   | 75.3    | 47.9    | 48.2    | 44.9    | Ler        | (Schaffer et al., 1998)                            |
| <i>lhy-1CCA1-ox</i>                 | -      | 59.7   | 58.3    | 54.7    | 50.6    | 50.8    | Ler        | This study                                         |
| <i>phyA -201</i>                    | 42.9   | 43     | 34.4    | 24.2    | 12.3    | 10.8    | Ler        | (Quail et al., 1994)                               |
| <i>phyB-1 (hy3-B064)</i>            | 33.2   | 28.1   | 28.8    | 18.2    | 10.3    | 7.8     | Ler        | (Quail et al., 1994)                               |
| <i>soc1-1</i>                       | -      | 65.5   | 64.3    | 37      | 22.5    | 20.4    | Ler        | (Onouchi et al., 2000)                             |
| <i>suc2:CO co-2</i>                 | -      | 14.2   | 14.1    | 13.3    | 11.6    | 15.2    | Ler        | (An et al., 2004)                                  |
| <i>suc2:SOCl soc1-1</i>             | -      | 53.2   | 48.2    | 27.2    | 22.3    | 16.6    | Ler        | (Searle et al., 2006)                              |
| <i>gi-3</i>                         | 46     | 43     | 42      | 42      | 34      | 27      | Ler        | (Koornneef et al., 1998)                           |
| <i>lhy-11 cca1-1</i>                | 42     | 15     | 10      | 9       | 8       | 7       | Ler        | (Mizoguchi et al., 2002)                           |
| <i>lhy-11 cca1-1 gi-3</i>           | 44     | 34     | 24      | 25      | 17      | 14      | Ler        | (Mizoguchi et al., 2005)                           |

**Ahmad, M., and Cashmore, A.R.** (1993). Hy4 Gene of *a-Thaliana* Encodes a Protein with Characteristics of a Blue-Light Photoreceptor. *Nature* **366**, 162-166.

**An, H., Roussot, C., Suarez-Lopez, P., Corbesier, L., Vincent, C., Pineiro, M., Hepworth, S., Mouradov, A., Justin, S., Turnbull, C., and Coupland, G.** (2004). CONSTANS acts in the phloem to regulate a systemic signal that

- induces photoperiodic flowering of *Arabidopsis*. *Development* **131**, 3615-3626.
- El-Assal, S.E.D., Alonso-Blanco, C., Peeters, A.J.M., Raz, V., and Koornneef, M.** (2001). A QTL for flowering time in *Arabidopsis* reveals a novel allele of *CRY2*. *Nature Genetics* **29**, 435-440.
- Green, R.M., and Tobin, E.M.** (1999). Loss of the circadian clock-associated protein 1 in *Arabidopsis* results in altered clock-regulated gene expression. *Proc Natl Acad Sci USA* **96**, 4176-4179.
- Hicks, K.A., Millar, A.J., Carre, I.A., Somers, D.E., Straume, M., MeeksWagner, D.R., and Kay, S.A.** (1996). Conditional circadian dysfunction of the *Arabidopsis* early-flowering 3 mutant. *Science* **274**, 790-792.
- Jarillo, J.A., Capel, J., Tang, R.-H., Yang, H.-Q., Alonso, J.M., Ecker, J.R., and Cashmore, A.R.** (2001). An *Arabidopsis* circadian clock component interacts with both *CRY1* and *phyB*. *Nature* **410**, 487-490.
- Koornneef, M., Alonso-Blanco, C., Vries, H.B.-D., Hanhart, C.J., and Peeters, A.J.M.** (1998). Genetic interactions among late-flowering mutants of *Arabidopsis*. *Genetics* **148**, 885-892.
- Lin, C., Yang, H., Guo, H., Mockler, T., Chen, J., and Cashmore, A.R.** (1998). Enhancement of blue-light sensitivity of *Arabidopsis* seedlings by a blue light receptor cryptochrome 2. *Proc Natl Acad Sci U S A* **95**, 2686-2690.
- Mcneillis, T.W., Von Arnim, A.G., Araki, T., Komeda, Y., Misera, S., and Deng, X.W.** (1994). Genetic and molecular analysis of an allelic series of *cop1* mutants suggests functional roles for the multiple protein domains. *Plant Cell* **6**, 487-500.
- Mizoguchi, T., Wheatley, K., Hanzawa, Y., Wright, L., Mizoguchi, M., Song, H.R., Carre, I.A., and Coupland, G.** (2002). *LHY* and *CCA1* are partially redundant genes required to maintain circadian rhythms in *Arabidopsis*. *Developmental Cell* **2**, 629-641.
- Mizoguchi, T., Wright, L., Fujiwara, S., Cremer, F., Lee, K., Onouchi, H., Mouradov, A., Fowler, S., Kamada, H., Putterill, J., and Coupland, G.** (2005). Distinct roles of *GIGANTEA* in promoting flowering and regulating circadian rhythms in *Arabidopsis*. *Plant Cell* **17**, 2255-2270.
- Onouchi, H., Igeno, M.I., Perilleux, C., Graves, K., and Coupland, G.** (2000). Mutagenesis of plants overexpressing *CONSTANS* demonstrates novel interactions among *Arabidopsis* flowering-time genes. *Plant Cell* **12**, 885-900.
- Quail, P.H., Briggs, W.R., Chory, J., Hangarter, R.P., Harberd, N.P., Kendrick, R.E., Koornneef, M., Parks, B., Sharrock, R.A., Schafer, E., Thompson, W.F., and Whitelam, G.C.** (1994). Spotlight on Phytochrome Nomenclature. *Plant Cell* **6**, 468-471.
- Robson, F., Costa, M.M.R., Hepworth, S., Vizir, I., Pineiro, M., Reeves, P.H., Putterill, J., and Coupland, G.** (2001). Functional importance of conserved domains in the flowering-time gene *CONSTANS* demonstrated by analysis of mutant alleles and transgenic plants. *Plant J* **28**, 619-631.
- Schaffer, R., Ramsay, N., Samach, A., Corden, S., Putterill, J., Carre, I.A., and Coupland, G.** (1998). The *late elongated hypocotyl* mutation of *Arabidopsis* disrupts circadian rhythms and the photoperiodic control of flowering. *Cell* **93**, 1219-1229.
- Searle, I., He, Y., Turck, F., Vincent, C., Fornara, F., Krober, S., Amasino, R.A., and Coupland, G.** (2006). The transcription factor *FLC* confers a flowering

response to vernalization by repressing meristem competence and systemic signaling in Arabidopsis. *Genes Dev* **20**, 898-912.

**Valverde, F., Mouradov, A., Soppe, W., Ravenscroft, D., Samach, A., and Coupland, G.** (2004). Photoreceptor regulation of CONSTANS protein and the mechanism of photoperiodic flowering. *Science* **303**, 1003-1006.

**Wang, Z.-Y., and Tobin, E.M.** (1998). Constitutive expression of the CIRCADIAN CLOCK ASSOCIATED 1 (CCA1) gene disrupts circadian rhythms and suppresses its own expression. *Cell* **93**, 1207-1217.

**Supplementary table 3 : Markers used for genotyping of the three mapping populations**

| Bs-1 x Ler       |                   |                      | Cen-0 x Ler     |                   |                      | Dijon-G x Ler     |                   |                      |
|------------------|-------------------|----------------------|-----------------|-------------------|----------------------|-------------------|-------------------|----------------------|
| SNP_ID           | Chromosome number | Chromosomal position | SNP_ID          | Chromosome number | Chromosomal position | SNP_ID            | Chromosome number | Chromosomal position |
| AtMSQT_NW_5_R    | 1                 | 1149280              | AtMSQT_NW_3     | 1                 | 642815               | 21606928          | 1                 | 21080340             |
| AtMSQT_NW_7      | 1                 | 2211034              | AtMSQT_NW_6     | 1                 | 1602136              | 21607148          | 5                 | 9448354              |
| AtMSQT_NW_9_R    | 1                 | 3229814              | AtMSQT_NW_10    | 1                 | 3607807              | 21607157          | 2                 | 14697188             |
| AtMSQT_NW_12     | 1                 | 4142539              | AtMSQT_NW_13    | 1                 | 4396087              | 21607175          | 3                 | 5140894              |
| AtMSQT_NW_13     | 1                 | 4396087              | AtMSQT_NW_14    | 1                 | 4569730              | 21607242          | 1                 | 9059270              |
| AtMSQT_NW_15_R   | 1                 | 5206767              | AtMSQT_NW_15    | 1                 | 5206767              | AtClark20_NW_10   | 1                 | 21081021             |
| AtMSQT_NW_16     | 1                 | 5482011              | AtMSQT_NW_17    | 1                 | 5923042              | AtClark20_NW_15   | 2                 | 4628353              |
| AtMSQT_NW_17     | 1                 | 5923042              | AtMSQT_NW_19    | 1                 | 6941169              | AtClark20_NW_17   | 2                 | 18998581             |
| AtMSQT_NW_20     | 1                 | 7198043              | AtMSQT_NW_20    | 1                 | 7198043              | AtClark20_NW_21   | 3                 | 647798               |
| AtMSQT_NW_21     | 1                 | 7449602              | AtMSQT_NW_23    | 1                 | 8015097              | AtClark20_NW_22   | 3                 | 937647               |
| 21607242         | 1                 | 9059270              | AtMSQT_NW_25    | 1                 | 9343320              | AtClark20_NW_23   | 3                 | 1346929              |
| AtMSQT_NW_25     | 1                 | 9343320              | AtMSQT_NW_28    | 1                 | 10720273             | AtClark20_NW_24_R | 3                 | 1633882              |
| AtMSQT_NW_26     | 1                 | 9973609              | AtMSQT_NW_29    | 1                 | 11466166             | AtClark20_NW_25   | 3                 | 1824539              |
| AtMSQT_NW_27     | 1                 | 10290940             | AtMSQT_NW_30    | 1                 | 11655519             | AtClark20_NW_26_R | 3                 | 2051855              |
| AtMSQT_NW_28     | 1                 | 10720273             | AtMSQT_NW_33    | 1                 | 13712241             | AtClark20_NW_27   | 3                 | 5300020              |
| AtMSQT_NW_30     | 1                 | 11655519             | AtClark20_NW_4  | 1                 | 16158741             | AtClark20_NW_29   | 3                 | 5917328              |
| AtClark20_NW_3_R | 1                 | 15626001             | AtMSQT_NW_36    | 1                 | 17355740             | AtClark20_NW_30   | 3                 | 6144175              |
| AtClark20_NW_4   | 1                 | 16158741             | AtMSQT_NW_39    | 1                 | 18340160             | AtClark20_NW_31_R | 3                 | 6337903              |
| AtMSQT_NW_39_R   | 1                 | 18340160             | AtMSQT_NW_41    | 1                 | 19864724             | AtClark20_NW_32   | 3                 | 11673340             |
| AtMSQT_NW_41_R   | 1                 | 19864724             | AtMSQT_NW_42    | 1                 | 20175347             | AtClark20_NW_33   | 3                 | 12098257             |
| 21606928         | 1                 | 21080340             | AtClark20_NW_8  | 1                 | 20338753             | AtClark20_NW_35   | 3                 | 12598501             |
| AtClark20_NW_10  | 1                 | 21081021             | AtClark20_NW_10 | 1                 | 21081021             | AtClark20_NW_39   | 3                 | 15219901             |
| AtClark20_NW_11  | 1                 | 21521616             | AtClark20_NW_11 | 1                 | 21521616             | AtClark20_NW_4    | 1                 | 16158741             |
| AtMSQT_NW_45     | 1                 | 22388154             | AtMSQT_NW_43    | 1                 | 21669254             | AtClark20_NW_41   | 4                 | 351884               |
| AtMSQT_NW_47_R   | 1                 | 23155781             | AtMSQT_NW_46    | 1                 | 22695276             | AtClark20_NW_42   | 4                 | 750390               |
| AtMSQT_NW_52     | 1                 | 24292774             | AtMSQT_NW_61    | 1                 | 28190334             | AtClark20_NW_43_R | 4                 | 814588               |
| AtMSQT_NW_53_R   | 1                 | 24598466             | AtMSQT_NW_63    | 1                 | 28981116             | AtClark20_NW_44   | 4                 | 2662322              |
| AtMSQT_NW_54     | 1                 | 24893649             | AtMSQT_NW_67    | 1                 | 30214313             | AtClark20_NW_45_R | 4                 | 2818035              |
| AtMSQT_NW_57_R   | 1                 | 26278413             | AtMSQT_NW_68    | 2                 | 285851               | AtClark20_NW_47   | 4                 | 3664481              |
| AtMSQT_NW_58     | 1                 | 26794838             | AtMSQT_NW_69    | 2                 | 347703               | AtClark20_NW_48   | 4                 | 3882432              |
| AtMSQT_NW_61     | 1                 | 28190334             | AtMSQT_NW_70    | 2                 | 764549               | AtClark20_NW_51   | 4                 | 12794669             |
| AtMSQT_NW_69_R   | 2                 | 347703               | AtMSQT_NW_71    | 2                 | 1283334              | AtClark20_NW_53   | 4                 | 13487895             |
| AtMSQT_NW_70     | 2                 | 764549               | AtMSQT_NW_73    | 2                 | 2270819              | AtClark20_NW_54   | 5                 | 10452144             |
| AtMSQT_NW_71_R   | 2                 | 1283334              | AtClark20_NW_12 | 2                 | 3053456              | AtClark20_NW_55   | 5                 | 10552533             |
| AtMSQT_NW_72_R   | 2                 | 1798445              | AtClark20_NW_15 | 2                 | 4628353              | AtClark20_NW_56_R | 5                 | 10942291             |
| AtMSQT_NW_74_R   | 2                 | 2477756              | AtMSQT_NW_78    | 2                 | 5804076              | AtClark20_NW_58   | 5                 | 12566845             |
| AtClark20_NW_12  | 2                 | 3053456              | AtMSQT_NW_79    | 2                 | 6499679              | AtClark20_NW_6    | 1                 | 16785975             |

|                   |   |          |                 |   |          |                   |   |          |
|-------------------|---|----------|-----------------|---|----------|-------------------|---|----------|
| AtClark20_NW_14   | 2 | 4324304  | AtMSQT_NW_81    | 2 | 7551659  | AtClark20_NW_60   | 5 | 20967895 |
| AtMSQT_NW_80      | 2 | 7072958  | AtMSQT_NW_93    | 2 | 12657150 | AtClark20_NW_61   | 5 | 21168091 |
| AtMSQT_NW_81      | 2 | 7551659  | AtMSQT_NW_95    | 2 | 13265124 | AtClark20_NW_64_R | 5 | 21903379 |
| AtMSQT_NW_82_R    | 2 | 7650228  | AtMSQT_NW_98    | 2 | 14003409 | AtClark20_NW_67   | 5 | 25759662 |
| AtMSQT_NW_85_R    | 2 | 9256095  | AtMSQT_NW_104   | 2 | 16908190 | AtClark20_NW_69   | 5 | 23995556 |
| AtMSQT_NW_86      | 2 | 9428987  | AtMSQT_NW_107   | 2 | 17899534 | AtClark20_NW_7    | 1 | 20228532 |
| AtMSQT_NW_90_R    | 2 | 11389427 | AtClark20_NW_17 | 2 | 18998581 | AtClark20_NW_70   | 5 | 24197344 |
| AtMSQT_NW_92_R    | 2 | 12296907 | AtClark20_NW_20 | 2 | 19573918 | AtClark20_NW_71   | 5 | 24292468 |
| AtMSQT_NW_97      | 2 | 13756416 | AtClark20_NW_21 | 3 | 647798   | AtClark20_NW_8_R  | 1 | 20338753 |
| AtMSQT_NW_98      | 2 | 14003409 | AtClark20_NW_23 | 3 | 1346929  | AtMSQT_NW_104_R   | 2 | 16908190 |
| 21607157          | 2 | 14697188 | AtClark20_NW_25 | 3 | 1824539  | AtMSQT_NW_107     | 2 | 17899534 |
| AtMSQT_NW_99      | 2 | 14801460 | AtClark20_NW_26 | 3 | 2051855  | AtMSQT_NW_108_R   | 2 | 18143139 |
| AtMSQT_NW_102_R   | 2 | 15986355 | AtMSQT_NW_115   | 3 | 2236458  | AtMSQT_NW_109     | 2 | 18701292 |
| AtMSQT_NW_103     | 2 | 16683968 | AtMSQT_NW_116   | 3 | 2236798  | AtMSQT_NW_110     | 2 | 18752840 |
| AtMSQT_NW_109     | 2 | 18701292 | AtMSQT_NW_118   | 3 | 3679541  | AtMSQT_NW_111     | 2 | 18986103 |
| AtMSQT_NW_111     | 2 | 18986103 | AtMSQT_NW_121   | 3 | 5235571  | AtMSQT_NW_113     | 3 | 580470   |
| AtClark20_NW_25   | 3 | 1824539  | AtClark20_NW_27 | 3 | 5300020  | AtMSQT_NW_114     | 3 | 2072780  |
| AtClark20_NW_26_R | 3 | 2051855  | AtClark20_NW_29 | 3 | 5917328  | AtMSQT_NW_115     | 3 | 2236458  |
| AtMSQT_NW_115     | 3 | 2236458  | AtClark20_NW_30 | 3 | 6144175  | AtMSQT_NW_116     | 3 | 2236798  |
| AtMSQT_NW_116     | 3 | 2236798  | AtClark20_NW_31 | 3 | 6337903  | AtMSQT_NW_118_R   | 3 | 3679541  |
| AtMSQT_NW_119     | 3 | 4141103  | AtMSQT_NW_122   | 3 | 6501848  | AtMSQT_NW_12      | 1 | 4142539  |
| 21607175          | 3 | 5140894  | AtMSQT_NW_125   | 3 | 7842636  | AtMSQT_NW_121     | 3 | 5235571  |
| AtMSQT_NW_121     | 3 | 5235571  | AtMSQT_NW_126   | 3 | 8118136  | AtMSQT_NW_122     | 3 | 6501848  |
| AtClark20_NW_27   | 3 | 5300020  | AtMSQT_NW_128   | 3 | 9342357  | AtMSQT_NW_123     | 3 | 6631361  |
| AtClark20_NW_30   | 3 | 6144175  | AtMSQT_NW_130   | 3 | 10142640 | AtMSQT_NW_126     | 3 | 8118136  |
| AtMSQT_NW_122     | 3 | 6501848  | AtMSQT_NW_131   | 3 | 10382414 | AtMSQT_NW_128     | 3 | 9342357  |
| AtMSQT_NW_123     | 3 | 6631361  | AtMSQT_NW_132   | 3 | 10790489 | AtMSQT_NW_13      | 1 | 4396087  |
| AtMSQT_NW_126     | 3 | 8118136  | AtClark20_NW_32 | 3 | 11673340 | AtMSQT_NW_130     | 3 | 10142640 |
| AtMSQT_NW_129     | 3 | 9747261  | AtClark20_NW_38 | 3 | 14952576 | AtMSQT_NW_135     | 3 | 15880430 |
| AtMSQT_NW_130     | 3 | 10142640 | AtMSQT_NW_134   | 3 | 15233489 | AtMSQT_NW_139     | 3 | 17166542 |
| AtMSQT_NW_131     | 3 | 10382414 | AtMSQT_NW_135   | 3 | 15880430 | AtMSQT_NW_144_R   | 3 | 19930624 |
| AtClark20_NW_38   | 3 | 14952576 | AtMSQT_NW_139   | 3 | 17166542 | AtMSQT_NW_145_R   | 3 | 20028381 |
| AtClark20_NW_39   | 3 | 15219901 | AtMSQT_NW_140   | 3 | 17766901 | AtMSQT_NW_149     | 3 | 21632608 |
| AtMSQT_NW_134_R   | 3 | 15233489 | AtMSQT_NW_143   | 3 | 19077245 | AtMSQT_NW_152_R   | 3 | 23411981 |
| AtMSQT_NW_135     | 3 | 15880430 | AtMSQT_NW_144   | 3 | 19930624 | AtMSQT_NW_153     | 4 | 1055234  |
| AtMSQT_NW_136     | 3 | 16489590 | AtMSQT_NW_146   | 3 | 20483289 | AtMSQT_NW_154     | 4 | 1442579  |
| AtMSQT_NW_137_R   | 3 | 16677052 | AtMSQT_NW_149   | 3 | 21632608 | AtMSQT_NW_162_R   | 4 | 5775707  |
| AtMSQT_NW_138     | 3 | 16883460 | AtMSQT_NW_150   | 3 | 22146494 | AtMSQT_NW_163_R   | 4 | 6272810  |
| AtMSQT_NW_142     | 3 | 18980664 | AtMSQT_NW_151   | 3 | 23053878 | AtMSQT_NW_165     | 4 | 7077926  |
| AtMSQT_NW_143     | 3 | 19077245 | AtMSQT_NW_154   | 4 | 1442579  | AtMSQT_NW_166_R   | 4 | 7177337  |
| 21607369          | 3 | 19628061 | AtClark20_NW_45 | 4 | 2818035  | AtMSQT_NW_167     | 4 | 7858288  |

|                 |   |          |                 |   |          |                 |   |          |
|-----------------|---|----------|-----------------|---|----------|-----------------|---|----------|
| AtMSQT_NW_144_R | 3 | 19930624 | AtMSQT_NW_158   | 4 | 3006915  | AtMSQT_NW_169_R | 4 | 8297963  |
| AtMSQT_NW_146   | 3 | 20483289 | AtClark20_NW_46 | 4 | 3317152  | AtMSQT_NW_17    | 1 | 5923042  |
| AtMSQT_NW_148   | 3 | 21230242 | AtClark20_NW_49 | 4 | 4197278  | AtMSQT_NW_172   | 4 | 9213312  |
| AtMSQT_NW_150   | 3 | 22146494 | AtMSQT_NW_160   | 4 | 4197278  | AtMSQT_NW_173   | 4 | 9580050  |
| AtMSQT_NW_151   | 3 | 23053878 | AtMSQT_NW_161   | 4 | 4933870  | AtMSQT_NW_174   | 4 | 9676920  |
| AtClark20_NW_40 | 4 | 195281   | AtMSQT_NW_162   | 4 | 5775707  | AtMSQT_NW_175   | 4 | 10482199 |
| AtMSQT_NW_153   | 4 | 1055234  | AtMSQT_NW_169   | 4 | 8297963  | AtMSQT_NW_176   | 4 | 10659464 |
| AtMSQT_NW_154   | 4 | 1442579  | AtMSQT_NW_171   | 4 | 9058157  | AtMSQT_NW_179   | 4 | 11984772 |
| AtClark20_NW_44 | 4 | 2662322  | AtMSQT_NW_173   | 4 | 9580050  | AtMSQT_NW_181_R | 4 | 12404112 |
| AtClark20_NW_46 | 4 | 3317152  | AtMSQT_NW_174   | 4 | 9676920  | AtMSQT_NW_182   | 4 | 13576590 |
| AtMSQT_NW_163_R | 4 | 6272810  | AtMSQT_NW_175   | 4 | 10482199 | AtMSQT_NW_183   | 4 | 14379747 |
| AtMSQT_NW_164   | 4 | 6924081  | AtMSQT_NW_179   | 4 | 11984772 | AtMSQT_NW_187_R | 4 | 16272521 |
| AtMSQT_NW_168   | 4 | 8078504  | AtMSQT_NW_180   | 4 | 12195813 | AtMSQT_NW_188   | 4 | 16383147 |
| AtMSQT_NW_169_R | 4 | 8297963  | AtMSQT_NW_181   | 4 | 12404112 | AtMSQT_NW_190   | 4 | 17258247 |
| AtMSQT_NW_171   | 4 | 9058157  | AtClark20_NW_50 | 4 | 12422864 | AtMSQT_NW_193   | 4 | 18187887 |
| AtMSQT_NW_172   | 4 | 9213312  | AtMSQT_NW_185   | 4 | 15329511 | AtMSQT_NW_196_R | 5 | 428961   |
| AtMSQT_NW_174   | 4 | 9676920  | AtMSQT_NW_186   | 4 | 15765120 | AtMSQT_NW_20    | 1 | 7198043  |
| AtMSQT_NW_175   | 4 | 10482199 | AtMSQT_NW_188   | 4 | 16383147 | AtMSQT_NW_200   | 5 | 1214057  |
| AtMSQT_NW_176   | 4 | 10659464 | AtMSQT_NW_189   | 4 | 16742072 | AtMSQT_NW_203   | 5 | 1931167  |
| AtMSQT_NW_178   | 4 | 11580143 | AtMSQT_NW_197   | 5 | 625679   | AtMSQT_NW_204   | 5 | 2192805  |
| AtMSQT_NW_179   | 4 | 11984772 | AtMSQT_NW_198   | 5 | 658085   | AtMSQT_NW_207   | 5 | 3227635  |
| AtMSQT_NW_180   | 4 | 12195813 | AtMSQT_NW_199   | 5 | 872350   | AtMSQT_NW_212   | 5 | 5726339  |
| 21607140        | 4 | 12326091 | AtMSQT_NW_202   | 5 | 1792936  | AtMSQT_NW_216   | 5 | 7279057  |
| AtMSQT_NW_181_R | 4 | 12404112 | AtMSQT_NW_203   | 5 | 1931167  | AtMSQT_NW_217   | 5 | 7881430  |
| AtClark20_NW_53 | 4 | 13487895 | AtMSQT_NW_205   | 5 | 2244739  | AtMSQT_NW_218   | 5 | 8821968  |
| AtMSQT_NW_184_R | 4 | 14732262 | AtMSQT_NW_208   | 5 | 3606967  | AtMSQT_NW_219   | 5 | 9448109  |
| AtMSQT_NW_186_R | 4 | 15765120 | AtMSQT_NW_209   | 5 | 4428863  | AtMSQT_NW_22_R  | 1 | 7842523  |
| AtMSQT_NW_189   | 4 | 16742072 | AtMSQT_NW_210   | 5 | 4721335  | AtMSQT_NW_220   | 5 | 9723221  |
| AtMSQT_NW_191_R | 4 | 17608924 | AtMSQT_NW_212   | 5 | 5726339  | AtMSQT_NW_222   | 5 | 13272366 |
| AtMSQT_NW_193   | 4 | 18187887 | AtMSQT_NW_213   | 5 | 6022607  | AtMSQT_NW_223   | 5 | 13614363 |
| AtMSQT_NW_194   | 4 | 18560346 | AtMSQT_NW_214   | 5 | 6620982  | AtMSQT_NW_226   | 5 | 14952567 |
| AtMSQT_NW_197   | 5 | 625679   | AtMSQT_NW_215   | 5 | 6621045  | AtMSQT_NW_229_R | 5 | 15767945 |
| AtMSQT_NW_199_R | 5 | 872350   | AtMSQT_NW_216   | 5 | 7279057  | AtMSQT_NW_230   | 5 | 16368333 |
| AtMSQT_NW_201   | 5 | 1446247  | AtClark20_NW_54 | 5 | 10452144 | AtMSQT_NW_231   | 5 | 16964744 |
| AtMSQT_NW_202   | 5 | 1792936  | AtClark20_NW_58 | 5 | 12566845 | AtMSQT_NW_232_R | 5 | 17171679 |
| AtMSQT_NW_203   | 5 | 1931167  | AtMSQT_NW_223   | 5 | 13614363 | AtMSQT_NW_233   | 5 | 17569667 |
| AtMSQT_NW_208_R | 5 | 3606967  | AtMSQT_NW_225   | 5 | 14216131 | AtMSQT_NW_234   | 5 | 17692746 |
| AtMSQT_NW_212   | 5 | 5726339  | AtMSQT_NW_226   | 5 | 14952567 | AtMSQT_NW_239_R | 5 | 19503408 |
| AtMSQT_NW_214   | 5 | 6620982  | AtMSQT_NW_230   | 5 | 16368333 | AtMSQT_NW_24    | 1 | 8535432  |
| AtMSQT_NW_215   | 5 | 6621045  | AtMSQT_NW_232   | 5 | 17171679 | AtMSQT_NW_240_R | 5 | 20215473 |
| AtMSQT_NW_216   | 5 | 7279057  | AtMSQT_NW_235   | 5 | 18258766 | AtMSQT_NW_243   | 5 | 20915321 |



|                   |   |          |                 |   |          |                 |   |          |
|-------------------|---|----------|-----------------|---|----------|-----------------|---|----------|
| AtMSQT_NW_219     | 5 | 9448109  | AtMSQT_NW_238   | 5 | 19124207 | AtMSQT_NW_245   | 5 | 22040877 |
| 21607148          | 5 | 9448354  | AtMSQT_NW_239   | 5 | 19503408 | AtMSQT_NW_246   | 5 | 22116737 |
| AtMSQT_NW_221     | 5 | 10427855 | AtMSQT_NW_240   | 5 | 20215473 | AtMSQT_NW_25    | 1 | 9343320  |
| AtClark20_NW_55   | 5 | 10552533 | AtMSQT_NW_241   | 5 | 20408817 | AtMSQT_NW_250_R | 5 | 23815848 |
| AtClark20_NW_57   | 5 | 12094924 | AtMSQT_NW_242   | 5 | 20518330 | AtMSQT_NW_251_R | 5 | 23920892 |
| AtClark20_NW_58   | 5 | 12566845 | AtMSQT_NW_243   | 5 | 20915321 | AtMSQT_NW_255   | 5 | 26029439 |
| AtClark20_NW_59   | 5 | 13124715 | AtClark20_NW_60 | 5 | 20967895 | AtMSQT_NW_257   | 5 | 26437896 |
| AtMSQT_NW_225_R   | 5 | 14216131 | AtMSQT_NW_244   | 5 | 21415762 | AtMSQT_NW_258   | 5 | 26708459 |
| AtMSQT_NW_226     | 5 | 14952567 | AtClark20_NW_64 | 5 | 21903379 | AtMSQT_NW_27    | 1 | 10290940 |
| AtMSQT_NW_230     | 5 | 16368333 | AtMSQT_NW_245   | 5 | 22040877 | AtMSQT_NW_29    | 1 | 11466166 |
| AtMSQT_NW_234     | 5 | 17692746 | AtMSQT_NW_248   | 5 | 22714753 | AtMSQT_NW_3     | 1 | 642815   |
| AtMSQT_NW_235     | 5 | 18258766 | AtMSQT_NW_249   | 5 | 23270994 | AtMSQT_NW_30    | 1 | 11655519 |
| AtMSQT_NW_239_R   | 5 | 19503408 | AtMSQT_NW_250   | 5 | 23815848 | AtMSQT_NW_33    | 1 | 13712241 |
| AtMSQT_NW_242     | 5 | 20518330 | AtClark20_NW_69 | 5 | 23995556 | AtMSQT_NW_36    | 1 | 17355740 |
| AtClark20_NW_60   | 5 | 20967895 | AtClark20_NW_71 | 5 | 24292468 | AtMSQT_NW_37    | 1 | 17572149 |
| AtMSQT_NW_244     | 5 | 21415762 | AtMSQT_NW_253   | 5 | 25301234 | AtMSQT_NW_38_R  | 1 | 17682693 |
| AtClark20_NW_64_R | 5 | 21903379 | AtMSQT_NW_254   | 5 | 25301371 | AtMSQT_NW_42_R  | 1 | 20175347 |
| AtMSQT_NW_245     | 5 | 22040877 | AtClark20_NW_65 | 5 | 25332478 | AtMSQT_NW_43    | 1 | 21669254 |
| AtMSQT_NW_246     | 5 | 22116737 | AtClark20_NW_66 | 5 | 25610434 | AtMSQT_NW_45    | 1 | 22388154 |
| AtMSQT_NW_248     | 5 | 22714753 | AtMSQT_NW_257   | 5 | 26437896 | AtMSQT_NW_46_R  | 1 | 22695276 |
| AtMSQT_NW_249     | 5 | 23270994 | AtClark20_NW_68 | 5 | 26591867 | AtMSQT_NW_48    | 1 | 23381850 |
| AtMSQT_NW_250_R   | 5 | 23815848 | AtMSQT_NW_258   | 5 | 26708459 | AtMSQT_NW_49_R  | 1 | 23395015 |
| AtMSQT_NW_251_R   | 5 | 23920892 |                 |   |          | AtMSQT_NW_5_R   | 1 | 1149280  |
| AtClark20_NW_69   | 5 | 23995556 |                 |   |          | AtMSQT_NW_50    | 1 | 23774007 |
| AtMSQT_NW_253     | 5 | 25301234 |                 |   |          | AtMSQT_NW_51_R  | 1 | 24071690 |
| AtMSQT_NW_254     | 5 | 25301371 |                 |   |          | AtMSQT_NW_56    | 1 | 25717894 |
| AtClark20_NW_66   | 5 | 25610434 |                 |   |          | AtMSQT_NW_63_R  | 1 | 28981116 |
| AtClark20_NW_67   | 5 | 25759662 |                 |   |          | AtMSQT_NW_64    | 1 | 29200001 |
| AtMSQT_NW_257     | 5 | 26437896 |                 |   |          | AtMSQT_NW_69_R  | 2 | 347703   |
|                   |   |          |                 |   |          | AtMSQT_NW_73    | 2 | 2270819  |
|                   |   |          |                 |   |          | AtMSQT_NW_78    | 2 | 5804076  |
|                   |   |          |                 |   |          | AtMSQT_NW_82_R  | 2 | 7650228  |
|                   |   |          |                 |   |          | AtMSQT_NW_87    | 2 | 9819476  |
|                   |   |          |                 |   |          | AtMSQT_NW_9_R   | 1 | 3229814  |
|                   |   |          |                 |   |          | AtMSQT_NW_91    | 2 | 11564803 |
|                   |   |          |                 |   |          | AtMSQT_NW_94    | 2 | 12821777 |
|                   |   |          |                 |   |          | AtMSQT_NW_95    | 2 | 13265124 |
|                   |   |          |                 |   |          | AtMSQT_NW_98    | 2 | 14003409 |

**Supplementary table 4 : QTL summary table**

| <b>Name</b>    | <b>Population</b> | <b>Chrom</b> | <b>Position (bp)</b> | <b>Condition</b> | <b>% explained variability</b> | <b>LOD score</b> |
|----------------|-------------------|--------------|----------------------|------------------|--------------------------------|------------------|
| <b>** AFT1</b> | Bs-1 x Ler        | I            | 23155781-26278413    | LD 14 h          | 5                              | 5                |
| <b>AFT2</b>    | Bs-1 x Ler        | V            | 6621045-7485588      | LD 14 h          | 35                             | 18               |
| <b>AFT3</b>    | Cen-0 x Ler       | IV           | 1442579-3006915      | LD 14 h          | 6                              | 8                |
| <b>AFT4</b>    | Cen-0 x Ler       | IV           | 9058157-11984772     | LD 14 h          | 3                              | 4                |
| <b>AFT5</b>    | Cen-0 x Ler       | IV           | 1242864-15765120     | LD 14 h          | 2                              | 2                |
| <b>AFT6</b>    | Cen-0 x Ler       | V            | 3606967-5726339      | LD 14 h          | 20                             | 11               |
| <b>AFT7</b>    | Cen-0 x Ler       | V            | 13614363-16368333    | LD 14 h          | 7                              | 4                |
| <b>AFT8</b>    | Dijon-G x Sha     | I            | 11655519-13712241    | SD 8 and 10 h    | 4                              | 4                |
| <b>AFT9</b>    | Dijon-G x Sha     | III          | 5917328-8118136      | SD 10 h          | 5                              | 5                |
| <b>AFT10</b>   | Dijon-G x Sha     | III          | 17166542-23411981    | SD 10 h          | 9                              | 5                |
| <b>AFT11</b>   | Dijon-G x Sha     | IV           | 351884-814588        | SD 8 and 10 h    | 45                             | 26               |
| <b>AFT12</b>   | Dijon-G x Sha     | IV           | 8297963-9580050      | SD 8 and 10 h    | 4                              | 4                |
| <b>AFT13</b>   | Dijon-G x Sha     | V            | 7279057-7881430      | SD 8 and 10 h    | 6                              | 7                |
| <b>AFT14</b>   | Dijon-G x Sha     | V            | 24292468-26029439    | SD 8 and 10 h    | 9                              | 7                |

\* AFT : ALTERED FLOWERING TIME

\*\* Putative QTL

## Supplementary Table 5

Statistical data for QTL validation shown in Figures 5 and 6

| Source                                         | Type III Sum of Squares | df     | Mean Square | F        | Sig.  |
|------------------------------------------------|-------------------------|--------|-------------|----------|-------|
| Corrected Model                                | 6628.729(a)             | 17.00  | 389.93      | 52.37    | 0.000 |
| Intercept                                      | 160016.28               | 1.00   | 160016.28   | 21492.79 | 0.000 |
| V_77.9                                         | 1257.25                 | 2.00   | 628.63      | 84.44    | 0.000 |
| F3                                             | 2324.27                 | 15.00  | 154.95      | 20.81    | 0.000 |
| Error                                          | 4169.26                 | 560.00 | 7.45        |          |       |
| Total                                          | 241918.00               | 578.00 |             |          |       |
| Corrected Total                                | 10797.99                | 577.00 |             |          |       |
| a R Squared = .614 (Adjusted R Squared = .602) |                         |        |             |          |       |

| Source        | Type III Sum of Squares | df | Mean square | F     | Sig   |
|---------------|-------------------------|----|-------------|-------|-------|
| I_24          | 6                       | 1  | 5.527       | 1.891 | 0.173 |
| V_77.9        | 15.321                  | 2  | 7.661       | 2.621 | 0.079 |
| I_24 * V_77.9 | 2.448                   | 2  | 1.224       | 0.419 | 0.659 |
| Error         | 216.254                 | 74 | 2.922       |       |       |
| Total         | 241.388                 | 79 | 3           |       |       |

| Source                                          | Type III Sum of Squares | df  | Mean Square | F          | Sig.   | Partial Eta Squared |
|-------------------------------------------------|-------------------------|-----|-------------|------------|--------|---------------------|
| Corrected Model                                 | 12489.795(a)            | 3   | 4163.265069 | 49.1409988 | 0.0000 | 0.290532746         |
| Intercept                                       | 268812.2321             | 1   | 268812.2321 | 3172.91869 | 0.0000 | 0.89810125          |
| F2 * DL                                         | 12489.79521             | 3   | 4163.265069 | 49.1409988 | 0.0000 | 0.290532746         |
| Error                                           | 30499.49051             | 360 | 84.72080696 |            |        |                     |
| Total                                           | 312574                  | 364 |             |            |        |                     |
| Corrected Total                                 | 42989.28571             | 363 |             |            |        |                     |
| a. R Squared = .291 (Adjusted R Squared = .285) |                         |     |             |            |        |                     |

| Source                                          | Type III Sum of Squares | df  | Mean Square | F          | Sig.   | Partial Eta Squared |
|-------------------------------------------------|-------------------------|-----|-------------|------------|--------|---------------------|
| Corrected Model                                 | 11541.514(a)            | 2   | 5770.756788 | 66.24454   | 0.0000 | 0.268474188         |
| Intercept                                       | 267925.9689             | 1   | 267925.9689 | 3075.61612 | 0.0000 | 0.894954808         |
| DL                                              | 10474.60721             | 1   | 10474.60721 | 120.241688 | 0.0000 | 0.249857173         |
| F2                                              | 1379.631364             | 1   | 1379.631364 | 15.837272  | 0.0001 | 0.04202682          |
| Error                                           | 31447.77214             | 361 | 87.11294221 |            |        |                     |
| Total                                           | 312574                  | 364 |             |            |        |                     |
| Corrected Total                                 | 42989.28571             | 363 |             |            |        |                     |
| a. R Squared = .268 (Adjusted R Squared = .264) |                         |     |             |            |        |                     |

**Supplementary table 5e : Tests of Between-Subjects Effects (Figure 6C)**

| CL 20                                           |                         |     |             |            |        |                     |
|-------------------------------------------------|-------------------------|-----|-------------|------------|--------|---------------------|
| Source                                          | Type III Sum of Squares | df  | Mean Square | F          | Sig.   | Partial Eta Squared |
| Corrected Model                                 | 8126.365(a)             | 12  | 677.1971034 | 7.16107705 | 0.0000 | 0.339745902         |
| Intercept                                       | 6855.55169              | 1   | 6855.55169  | 72.4946011 | 0.0000 | 0.302698269         |
| @4_2.885679                                     | 1622.16782              | 3   | 540.7226066 | 5.71791614 | 0.0009 | 0.093149059         |
| @5_3.606967                                     | 2229.509333             | 3   | 743.1697776 | 7.85871057 | 0.0001 | 0.123709782         |
| @5_7.279057                                     | 1363.491918             | 3   | 454.4973061 | 4.80611953 | 0.0031 | 0.079475742         |
| Error                                           | 15792.58476             | 167 | 94.56637581 |            |        |                     |
| Total                                           | 140811                  | 180 |             |            |        |                     |
| Corrected Total                                 | 23918.95                | 179 |             |            |        |                     |
| CL 97                                           |                         |     |             |            |        |                     |
| Source                                          | Type III Sum of Squares | df  | Mean Square | F          | Sig.   | Partial Eta Squared |
| Corrected Model                                 | 943.628(b)              | 3   | 314.5425958 | 3.31877643 | 0.0211 | 0.05241378          |
| Intercept                                       | 52265.44621             | 1   | 52265.44621 | 551.458954 | 0.0000 | 0.753916472         |
| @4_9.580049                                     | 943.6277875             | 3   | 314.5425958 | 3.31877643 | 0.0211 | 0.05241378          |
| Error                                           | 17059.80156             | 180 | 94.77667533 |            |        |                     |
| Total                                           | 171763                  | 184 |             |            |        |                     |
| Corrected Total                                 | 18003.42935             | 183 |             |            |        |                     |
| a. R Squared = .340 (Adjusted R Squared = .292) |                         |     |             |            |        |                     |
| b. R Squared = .052 (Adjusted R Squared = .037) |                         |     |             |            |        |                     |

**Supplementary table 5f : Tests of Between-Subjects Effects (Figure 6D)**

| Source                                          | Type III Sum of Squares | df  | Mean Square | F          | Sig.   | Partial Eta Squared |
|-------------------------------------------------|-------------------------|-----|-------------|------------|--------|---------------------|
| Corrected Model                                 | 8902.965(a)             | 19  | 468.5771292 | 4.9928355  | 0.0000 | 0.372213891         |
| Intercept                                       | 33456.71026             | 1   | 33456.71026 | 356.491686 | 0.0000 | 0.690217666         |
| @4_0.288567 *<br>@5_7.279057                    | 2898.473655             | 9   | 322.0526284 | 3.43157123 | 0.0007 | 0.161795217         |
| @4_2.885679 *<br>@5_3.606967                    | 1909.584656             | 7   | 272.797808  | 2.90674575 | 0.0069 | 0.112822478         |
| Error                                           | 15015.98454             | 160 | 93.8499034  |            |        |                     |
| Total                                           | 140811                  | 180 |             |            |        |                     |
| Corrected Total                                 | 23918.95                | 179 |             |            |        |                     |
| a. R Squared = .372 (Adjusted R Squared = .298) |                         |     |             |            |        |                     |

**Supplementary table 5g : Tests of Between-Subjects Effects CL 20 (Figure 6B)**

| CL 20               |                         |     |             |            |        |                     |
|---------------------|-------------------------|-----|-------------|------------|--------|---------------------|
| Source              | Type III Sum of Squares | df  | Mean Square | F          | Sig.   | Partial Eta Squared |
| Corrected Model     | 13432.063(a)            | 23  | 584.0027374 | 8.68746147 | 0.0000 | 0.561565744         |
| Intercept           | 9710.367943             | 1   | 9710.367943 | 144.448719 | 0.0000 | 0.480776618         |
| @4_2.885679 *<br>DL | 1244.583327             | 5   | 248.9166654 | 3.70281473 | 0.0034 | 0.106089287         |
| @5_3.606967 * DL    | 1680.245235             | 5   | 336.049047  | 4.99897168 | 0.0003 | 0.138097063         |
| @5_7.279057 * DL    | 1233.032592             | 5   | 246.6065183 | 3.66844963 | 0.0036 | 0.10520828          |
| @5_7.842993 * DL    | 1322.560003             | 6   | 220.4266672 | 3.27900548 | 0.0046 | 0.111991696         |
| Error               | 10486.88704             | 156 | 67.22363486 |            |        |                     |
| Total               | 140811                  | 180 |             |            |        |                     |
| Corrected Total     | 23918.95                | 179 |             |            |        |                     |

**CL 97**

| <b>Source</b>       | <b>Type III Sum of Squares</b> | <b>df</b> | <b>Mean Square</b> | <b>F</b>   | <b>Sig.</b> | <b>Partial Eta Squared</b> |
|---------------------|--------------------------------|-----------|--------------------|------------|-------------|----------------------------|
| Corrected Model     | 10747.037(b)                   | 12        | 895.5863816        | 21.1048762 | 0.0000      | 0.596943858                |
| Intercept           | 40622.74616                    | 1         | 40622.74616        | 957.292392 | 0.0000      | 0.848443541                |
| @4_2.885679 *<br>DL | 832.8005086                    | 6         | 138.8000848        | 3.27088338 | 0.0045      | 0.102952233                |
| @4_9.580049 * DL    | 860.3014657                    | 5         | 172.0602931        | 4.05467442 | 0.0017      | 0.105991607                |
| Error               | 7256.392769                    | 171       | 42.43504543        |            |             |                            |
| Total               | 171763                         | 184       |                    |            |             |                            |
| Corrected Total     | 18003.42935                    | 183       |                    |            |             |                            |

a. R Squared = .562 (Adjusted R Squared = .497)

b. R Squared = .597 (Adjusted R Squared = .569)
